# Supplementary material for: Global, regional and national sodium intakes in 1990 and 2010: a systematic analysis of 24 h urinary sodium excretion and dietary surveys worldwide
Source: HighWire-hosted journal article supplement (doi:10.1136/bmjopen-2013-003733), 2013-12-01

**Figure S1.** Guide to model outputs for regions

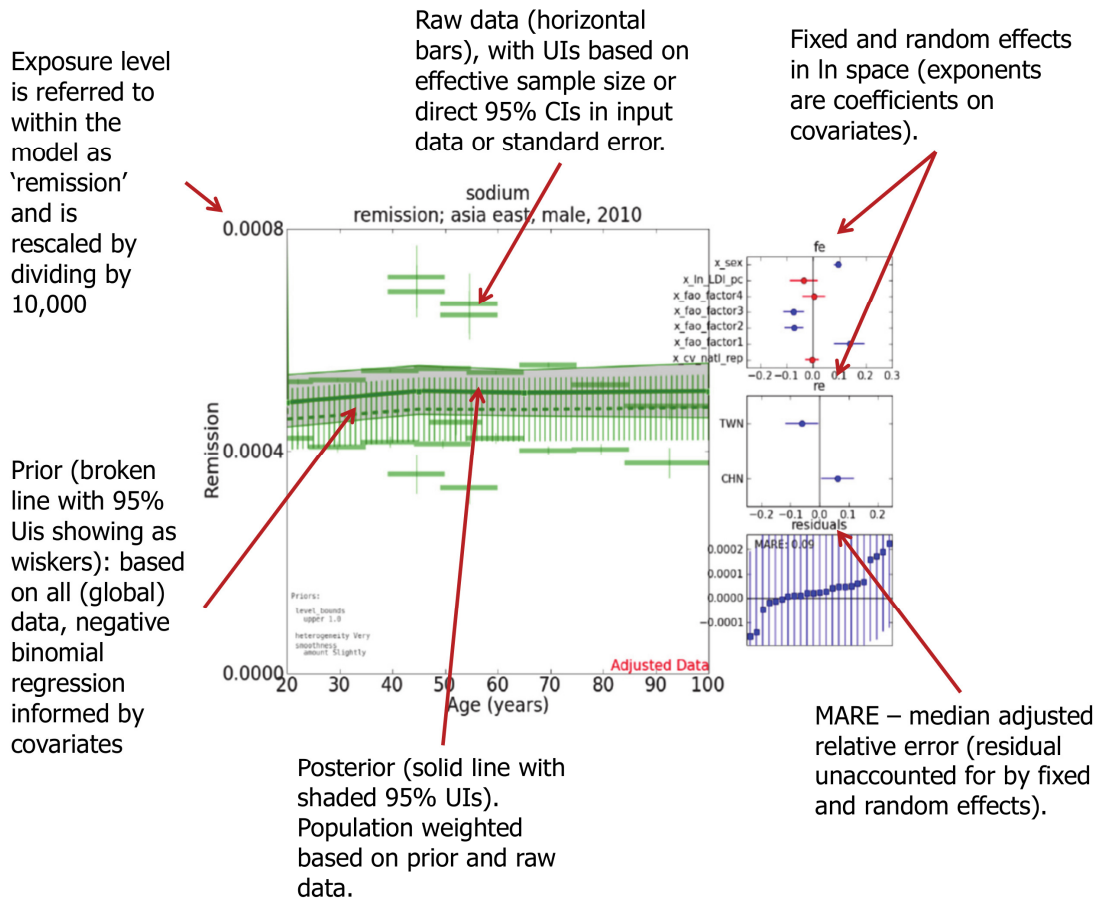

Figure S2. Model output for regions (1)

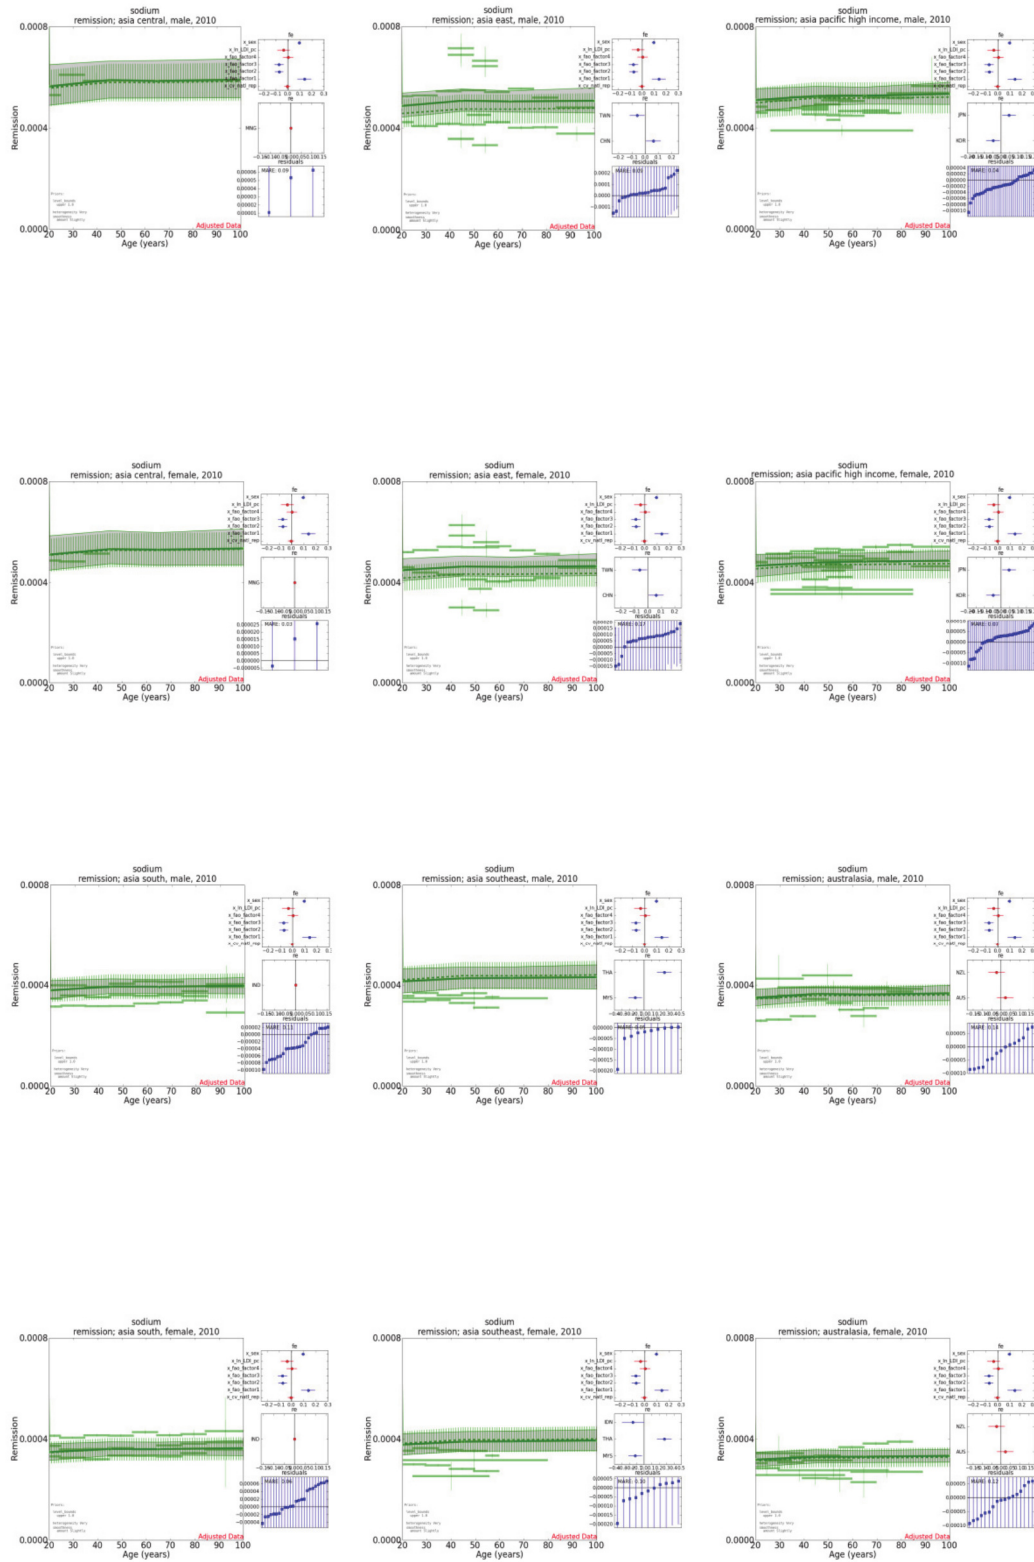

Figure S3. Model output for regions (2)

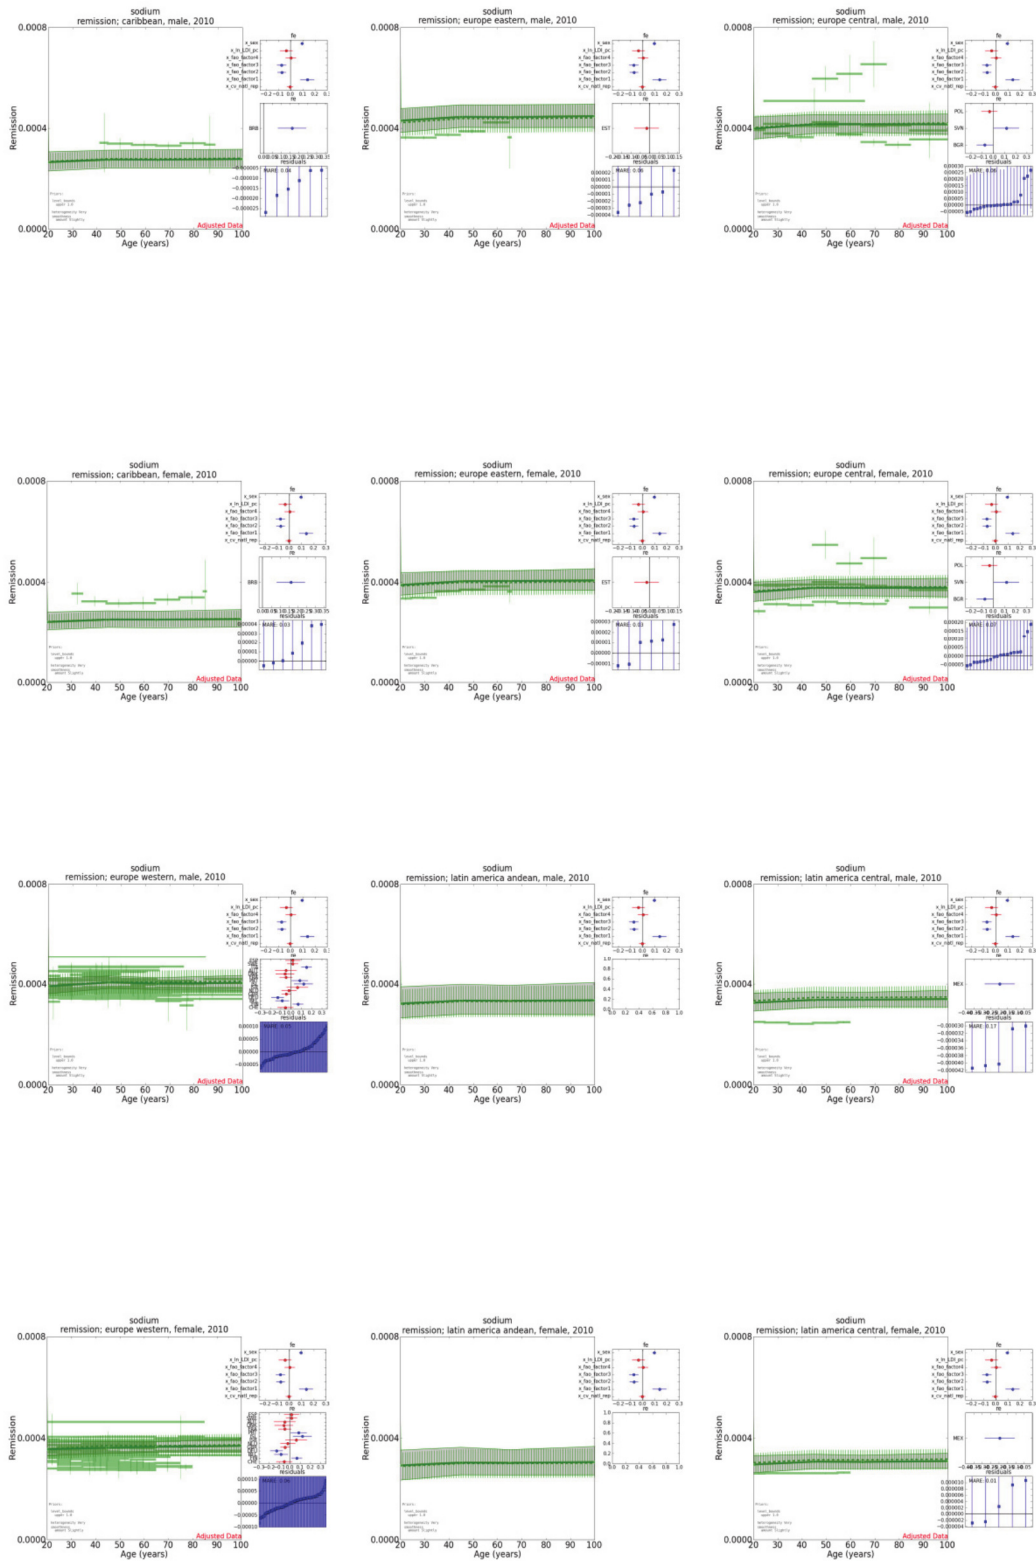

Figure S4. Model output for regions (3)

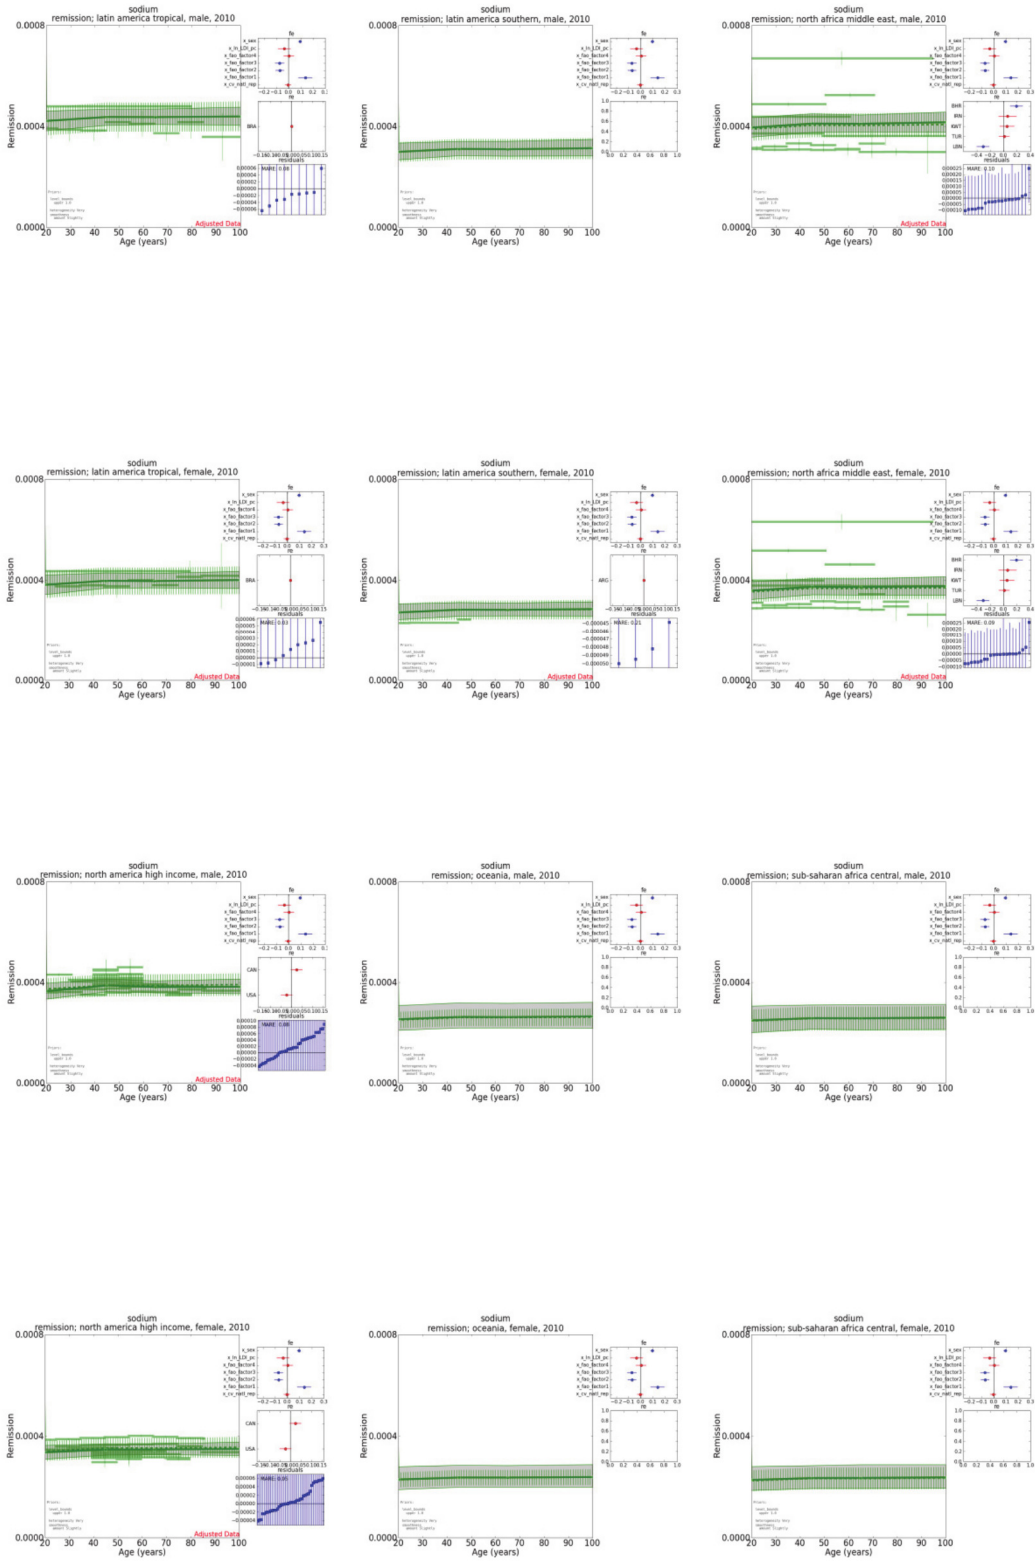

Figure S5. Model output for regions (4)

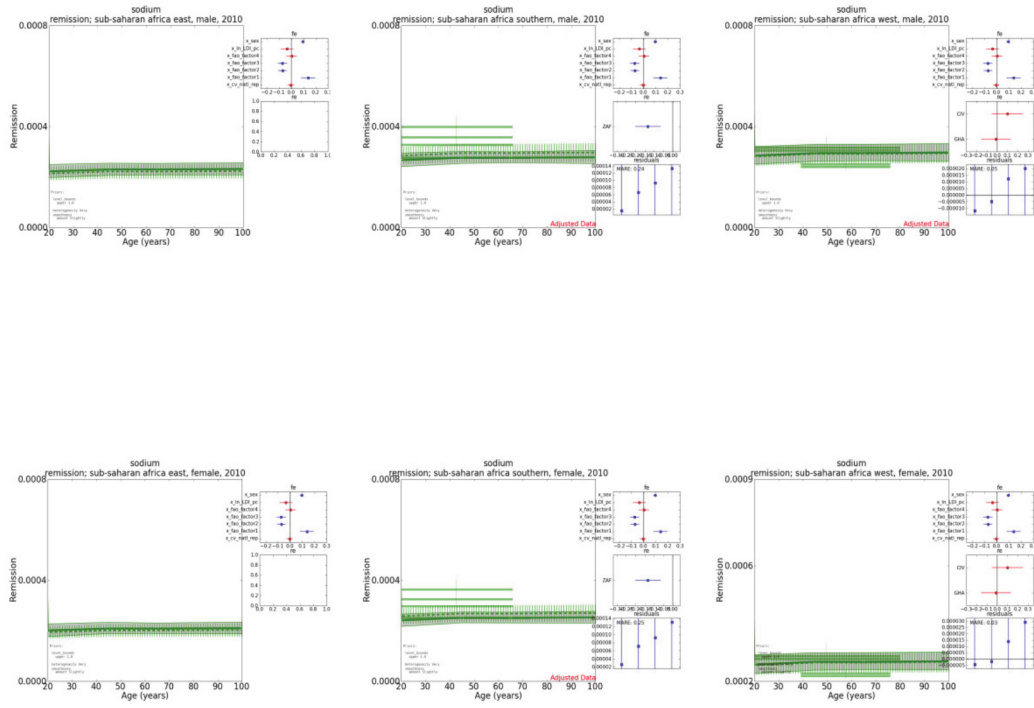

Supplement: bmjopen-2013-003733supp_figures.pdf [file bmjopen-2013-003733supp_figures.pdf]
