# Supplementary material for: Global, regional and national sodium intakes in 1990 and 2010: a systematic analysis of 24 h urinary sodium excretion and dietary surveys worldwide
Source: HighWire-hosted journal article supplement (doi:10.1136/bmjopen-2013-003733), 2013-12-01
Supplement: bmjopen-2013-003733supp_table.pdf [file bmjopen-2013-003733supp_table.pdf]

**Supplementary Table. Surveys and survey pairs used in the assessment of sodium exposure with identification of sources for published reports and of corresponding members where data was provided on request. Survey pairs, indicated by B (for Both) under Metrics, include both urine-based and diet-based surveys for the same source population.**

| Country (with included surveys)  | Survey name or report authors (CM, corresponding members – see main text) | Metrics (Urine, Diet, Both) | Mid-year of data collection | National, Subnational | Sample size |        |                | Age range | Urine method (where applic.) <sub>1</sub> | Diet method (where applic.) <sub>2</sub> |
|----------------------------------|---------------------------------------------------------------------------|-----------------------------|-----------------------------|-----------------------|-------------|--------|----------------|-----------|-------------------------------------------|------------------------------------------|
|                                  |                                                                           |                             |                             |                       | M           | F      | T <sup>3</sup> |           |                                           |                                          |
| <b>Asia-Pacific, High Income</b> |                                                                           |                             |                             |                       |             |        |                |           |                                           |                                          |
| Japan                            | INTERSALT, Osaka [1]                                                      | U                           | 1986                        | S                     | 100         | 97     |                | 20-59     | 2                                         |                                          |
| Japan                            | INTERSALT, Tochigi [1]                                                    | U                           | 1986                        | S                     | 95          | 98     |                | 20-59     | 2                                         |                                          |
| Japan                            | INTERSALT, Toyama [1]                                                     | U                           | 1986                        | S                     | 100         | 100    |                | 20-59     | 2                                         |                                          |
| Japan                            | Liu et al. [2]                                                            | U                           | 1991                        | N                     | 484         | 542    |                | 48-56     | 2                                         |                                          |
| Japan                            | Kawamura et al. [3]                                                       | U                           | 1993                        | S                     | 90          | 50     |                | 30-65     | 2                                         |                                          |
| Japan                            | National Nutrition Survey (in Japan) [4]                                  | D                           | 1995                        | N                     | 4,976       | 5,790  |                | 20-100    |                                           | 3                                        |
| Japan                            | Sasaki et al. [5]                                                         | B                           | 1996                        | S                     | 308         | 138    |                | 20-25     | 4                                         | 3                                        |
| Japan                            | The Japan Public Health Center-based Prospective Study (JPHC Study) [6]   | D                           | 1996                        | S                     | 45,593      | 52,175 |                | 45-74     |                                           | 2                                        |
| Japan                            | INTERMAP, Aito Town [7]                                                   | B                           | 1997                        | S                     | 260         | 258    |                | 40-59     | 2                                         | 3                                        |
| Japan                            | INTERMAP, Sapporo [7]                                                     | B                           | 1997                        | S                     | 298         | 296    |                | 40-59     | 2                                         | 3                                        |
| Japan                            | INTERMAP, Toyama [7]                                                      | B                           | 1997                        | S                     | 298         | 300    |                | 40-59     | 2                                         | 3                                        |
| Japan                            | INTERMAP, Wakayama [7]                                                    | B                           | 1997                        | S                     | 292         | 288    |                | 40-59     | 2                                         | 3                                        |
| Japan                            | National Nutrition Survey (in Japan) [8]                                  | D                           | 1998                        | N                     | 5,067       | 5,850  |                | 20-100    |                                           | 3                                        |
| Japan                            | Kimira et al. [9]                                                         | B                           | 1999                        | S                     |             |        | 438            | 27-84     | 4                                         | 3                                        |
| Japan                            | The Japan Public Health Center-based Prospective Study (JPHC Study) [10]  | D                           | 2001                        | S                     | 43,073      | 49,229 |                | 50-79     |                                           | 2                                        |
| Republic of Korea                | Korea National Health and Nutrition Examination                           | D                           | 2005                        | N                     | 2,877       | 3,563  |                | 20-100    |                                           | 3                                        |

| Country (with included surveys) | Survey name or report authors (CM, corresponding members – see main text) | Metrics (Urine, Diet, Both) | Mid-year of data collection | National, Subnational | Sample size |      |                | Age range | Urine method (where applic.) <sub>1</sub> | Diet method (where applic.) <sub>2</sub> |
|---------------------------------|---------------------------------------------------------------------------|-----------------------------|-----------------------------|-----------------------|-------------|------|----------------|-----------|-------------------------------------------|------------------------------------------|
|                                 |                                                                           |                             |                             |                       | M           | F    | T <sup>3</sup> |           |                                           |                                          |
|                                 | Survey (KNHANES) III [11]                                                 |                             |                             |                       |             |      |                |           |                                           |                                          |
| Republic of Korea               | INTERSALT, Pusan [1]                                                      | U                           | 1986                        | S                     | 100         | 98   | 20-59          | 2         |                                           |                                          |
| <b>Asia, Central</b>            |                                                                           |                             |                             |                       |             |      |                |           |                                           |                                          |
| Mongolia                        | Yamada et al. [12]                                                        | U                           | 1998                        | N                     | 571         | 598  | 20-44          | 4         |                                           |                                          |
| <b>Asia, East</b>               |                                                                           |                             |                             |                       |             |      |                |           |                                           |                                          |
| China                           | Zhao GS et al. ( 1 of 3) [13]                                             | U                           | 1983                        | S                     | 92          |      | 40-59          | 4         |                                           |                                          |
| China                           | Zhao GS et al. (2 of 3) [13]                                              | U                           | 1983                        | S                     | 82          |      | 40-59          | 4         |                                           |                                          |
| China                           | Zhao GS et al. (3 of 3) [13]                                              | U                           | 1983                        | S                     | 83          |      | 40-59          | 4         |                                           |                                          |
| China                           | Zhou BF et al. (1 of 9) [14]                                              | D                           | 1983                        | S                     | 342         |      | 35-59          |           |                                           | 1                                        |
| China                           | Zhou BF et al. (2 of 9) [14]                                              | D                           | 1983                        | S                     | 124         |      | 35-59          |           |                                           | 1                                        |
| China                           | Zhou BF et al. (3 of 9) [14]                                              | D                           | 1983                        | S                     | 51          |      | 35-59          |           |                                           | 1                                        |
| China                           | Zhou BF et al. (4 of 9) [14]                                              | D                           | 1983                        | S                     | 119         |      | 35-59          |           |                                           | 1                                        |
| China                           | Zhou BF et al. (5 of 9) [14]                                              | D                           | 1983                        | S                     | 181         |      | 35-59          |           |                                           | 1                                        |
| China                           | Zhou BF et al. (6 of 9) [14]                                              | D                           | 1983                        | S                     | 215         |      | 35-59          |           |                                           | 1                                        |
| China                           | Zhou BF et al. (7 of 9) [14]                                              | D                           | 1983                        | S                     | 85          |      | 35-59          |           |                                           | 1                                        |
| China                           | Zhou BF et al. (8 of 9) [14]                                              | D                           | 1983                        | S                     | 212         |      | 35-59          |           |                                           | 1                                        |
| China                           | Zhou BF et al. (9 of 9) [14]                                              | D                           | 1983                        | S                     | 195         |      | 35-59          |           |                                           | 1                                        |
| China                           | INTERSALT, Beijing [1]                                                    | U                           | 1986                        | S                     | 100         | 100  | 20-59          | 2         |                                           |                                          |
| China                           | INTERSALT, Nanning [1]                                                    | U                           | 1986                        | S                     | 100         | 100  | 20-59          | 2         |                                           |                                          |
| China                           | INTERSALT, Tianjin [1]                                                    | U                           | 1986                        | S                     | 100         | 100  | 20-59          | 2         |                                           |                                          |
| China                           | Liu et al. [2]                                                            | U                           | 1992                        | N                     | 403         | 408  | 48-56          | 2         |                                           |                                          |
| China                           | Nan et al. [15]                                                           | D                           | 1992                        | N                     | 1133        | 1184 | 20-64          |           |                                           | 1                                        |
| China                           | INTERMAP, Beijing [7]                                                     | B                           | 1997                        | S                     | 266         | 278  | 40-59          | 2         |                                           | 3                                        |
| China                           | INTERMAP, Guangxi [7]                                                     | B                           | 1997                        | S                     | 280         | 276  | 40-59          | 2         |                                           | 3                                        |

| Country (with included surveys) | Survey name or report authors (CM, corresponding members – see main text)                         | Metrics (Urine, Diet, Both) | Mid-year of data collection | National, Subnational | Sample size |        |                | Age range | Urine method (where applic.) <sub>1</sub> | Diet method (where applic.) <sub>2</sub> |
|---------------------------------|---------------------------------------------------------------------------------------------------|-----------------------------|-----------------------------|-----------------------|-------------|--------|----------------|-----------|-------------------------------------------|------------------------------------------|
|                                 |                                                                                                   |                             |                             |                       | M           | F      | T <sup>3</sup> |           |                                           |                                          |
| China                           | INTERMAP, Shanxi [7]                                                                              | B                           | 1997                        | S                     | 286         | 292    |                | 40-59     | 2                                         | 3                                        |
| China                           | 2002 China National Nutrition and Health Survey [16]                                              | D                           | 2002                        | N                     | 24,020      | 27,109 |                | 20-101    |                                           | 1                                        |
| Taiwan                          | INTERSALT, San Chilo Village [1]                                                                  | U                           | 1986                        | S                     | 89          | 92     |                | 20-59     | 2                                         |                                          |
| Taiwan                          | 2005-2008 Nutrition and Health Survey in Taiwan [17]                                              | D                           | 2006                        | N                     | 1,446       | 1,462  |                | 20-100    |                                           | 3                                        |
| <b>Asia, South</b>              |                                                                                                   |                             |                             |                       |             |        |                |           |                                           |                                          |
| India                           | INTERSALT, New Delhi [1]                                                                          | U                           | 1986                        | S                     | 100         | 99     |                | 20-59     | 2                                         |                                          |
| India                           | INTERSALT, Stok, Ladakh [1]                                                                       | U                           | 1986                        | S                     | 100         | 100    |                | 20-59     | 2                                         |                                          |
| India                           | National Nutrition Monitoring Bureau (NNMB) Rural Surveys [18]                                    | D                           | 1996                        | S                     | 3,863       | 4,160  |                | 20-100    |                                           | 3                                        |
| India                           | National Nutrition Monitoring Bureau (NNMB) Rural Surveys [19]                                    | D                           | 2000                        | S                     | 8,314       | 8,888  |                | 20-100    |                                           | 3                                        |
| India                           | Radhika et al. [20]                                                                               | D                           | 2003                        | S                     |             |        | 1902           | 20-79     |                                           | 2                                        |
| India                           | National Nutrition Monitoring Bureau (NNMB) Rural Surveys [21]                                    | D                           | 2005                        | S                     | 8,824       | 9,468  |                | 20-100    |                                           | 3                                        |
| <b>Asia, South-East</b>         |                                                                                                   |                             |                             |                       |             |        |                |           |                                           |                                          |
| Indonesia                       | Mustafa et al. [22]                                                                               | U                           | 2003                        | S                     |             | 15     |                | 25-55     | 4                                         |                                          |
| Malaysia                        | Malaysian Adult Nutrition Survey 2002 [23]                                                        | D                           | 2002                        | N                     | 3,117       | 3,340  |                | 20-59     |                                           | 3                                        |
| Malaysia                        | Malaysian Adults Nutrition Survey 2003 [23]                                                       | D                           | 2003                        | N                     | 3,464       | 3,464  |                | 20-59     |                                           | 3                                        |
| Thailand                        | Calcium Status, Factors Affecting Calcium and Bone Status in Healthy Thais Living in Bangkok [24] | D                           | 1993                        | S                     | 153         | 243    |                | 20-80     |                                           | 3                                        |
| Thailand                        | Kwanmaung et al. (1 of 2) [25]                                                                    | U                           | 1998                        | S                     |             |        | 18             | 20-79     | 4                                         |                                          |
| <b>Australasia</b>              |                                                                                                   |                             |                             |                       |             |        |                |           |                                           |                                          |
| Australia                       | Beard et al. [26]                                                                                 | U                           | 1989                        | S                     | 22          | 32     |                | 24-69     | 4                                         |                                          |
| Australia                       | Notowidjojo et al. [27]                                                                           | U                           | 1992                        | S                     | 64          | 64     |                | 20-64     | 4                                         |                                          |
| Australia                       | Beard et al. [28]                                                                                 | U                           | 1995                        | S                     | 87          | 107    |                | 20-70     | 2                                         |                                          |
| Australia                       | Margerison [29] (and CM)                                                                          | U                           | 2003                        | S                     | 79          | 65     |                | 30-74     | 4                                         |                                          |

| Country (with included surveys) | Survey name or report authors (CM, corresponding members – see main text)                                                              | Metrics (Urine, Diet, Both) | Mid-year of data collection | National, Subnational | Sample size |       |                | Age range | Urine method (where applic.) <sub>1</sub> | Diet method (where applic.) <sub>2</sub> |
|---------------------------------|----------------------------------------------------------------------------------------------------------------------------------------|-----------------------------|-----------------------------|-----------------------|-------------|-------|----------------|-----------|-------------------------------------------|------------------------------------------|
|                                 |                                                                                                                                        |                             |                             |                       | M           | F     | T <sup>3</sup> |           |                                           |                                          |
| Australia                       | Charlton et al. [30]                                                                                                                   | U                           | 2007                        | S                     |             | 78    |                | 20-56     | 4                                         |                                          |
| Australia                       | Land et al. [31] (and CM)                                                                                                              | U                           | 2011                        | S                     | 144         | 162   |                | 20-88     | 4                                         |                                          |
| New Zealand                     | Simpson et al. [32]                                                                                                                    | U                           | 1981                        | S                     | 473         | 502   |                | 20-93     | 4                                         |                                          |
| New Zealand                     | Thomson and Colls [33]                                                                                                                 | U                           | 1995                        | S                     | 313         | 319   |                | 20-69     | 4                                         |                                          |
| New Zealand                     | NZ National Nutrition Survey 1997 [34]                                                                                                 | D                           | 1997                        | N                     | 1,678       | 2,884 |                | 20-84     |                                           | 1                                        |
| <b>Caribbean</b>                |                                                                                                                                        |                             |                             |                       |             |       |                |           |                                           |                                          |
| Barbados                        | Cooper et al. [35]                                                                                                                     | U                           | 1992                        | S                     |             |       | 813            | 25-74     | 4                                         |                                          |
| Barbados                        | Identifying new genetic and obesity-related factors contributing to prostate and breast cancer risk in persons of African descent [36] | D                           | 2005                        | N                     | 152         | 128   |                | 31-88     |                                           | 2                                        |
| Belize                          | Simmons et al. [37]                                                                                                                    | U                           | 1980                        | S                     | 392         |       |                | 20-94     | 4                                         |                                          |
| Jamaica                         | Cooper et al. [35]                                                                                                                     | U                           | 1994                        | S                     |             |       | 1,357          | 25-74     | 4                                         |                                          |
| Jamaica                         | Social and dietary determinants of body mass index of adult Jamaicans [38]                                                             | D                           | 1994                        | N                     | 363         | 560   |                | 25-74     |                                           | 2                                        |
| St. Lucia                       | Cooper et al. [35]                                                                                                                     | U                           | 1992                        | S                     |             |       | 1,089          | 25-74     | 4                                         |                                          |
| Trinidad and Tobago             | INTERSALT, Plymouth-Bethesda [1]                                                                                                       | U                           | 1986                        | S                     | 84          | 92    |                | 20-59     | 2                                         |                                          |
| <b>Europe, Central</b>          |                                                                                                                                        |                             |                             |                       |             |       |                |           |                                           |                                          |
| Bulgaria                        | Powles et al. [39] (and CM)                                                                                                            | U                           | 1999                        | S                     | 74          | 84    |                | 45-74     | 1                                         |                                          |
| Bulgaria                        | National Nutrition Survey [40]                                                                                                         | D                           | 2004                        | N                     | 410         | 443   |                | 20-100    |                                           | 3                                        |
| Hungary                         | INTERSALT, Porcsalam village [1]                                                                                                       | U                           | 1986                        | S                     | 100         | 100   |                | 20-59     | 2                                         |                                          |
| Poland                          | INTERSALT, Warsaw [1]                                                                                                                  | U                           | 1986                        | S                     | 100         | 100   |                | 20-59     | 2                                         |                                          |
| Poland                          | Household Food Consumption and Anthropometric Survey [41]                                                                              | D                           | 2000                        | N                     | 1,247       | 1,574 |                | 20-100    |                                           | 3                                        |
| Slovenia                        | Ribic et al. [42]                                                                                                                      | U                           | 2007                        | N                     | 61          | 82    |                | 25-65     | 2                                         |                                          |
| <b>Europe, East</b>             |                                                                                                                                        |                             |                             |                       |             |       |                |           |                                           |                                          |

| Country (with included surveys) | Survey name or report authors (CM, corresponding members – see main text) | Metrics (Urine, Diet, Both) | Mid-year of data collection | National, Subnational | Sample size |       |                | Age range | Urine method (where applic.) <sub>1</sub> | Diet method (where applic.) <sub>2</sub> |
|---------------------------------|---------------------------------------------------------------------------|-----------------------------|-----------------------------|-----------------------|-------------|-------|----------------|-----------|-------------------------------------------|------------------------------------------|
|                                 |                                                                           |                             |                             |                       | M           | F     | T <sup>3</sup> |           |                                           |                                          |
| Estonia                         | Estonian National Dietary Survey [43]                                     | D                           | 1997                        | N                     | 878         | 1,098 |                | 20-65     |                                           | 3                                        |
| Russian Federation              | INTERSALT, Moscow [1]                                                     | U                           | 1986                        | S                     | 97          | 97    |                | 20-59     | 2                                         |                                          |
| <b>Europe, West</b>             |                                                                           |                             |                             |                       |             |       |                |           |                                           |                                          |
| Austria                         | Austrian Study on Nutritional Status 2007 [44]                            | D                           | 2007                        | N                     | 925         | 1,547 |                | 20-100    |                                           | 3                                        |
| Belgium                         | Staessen et al. [45]                                                      | U                           | 1980                        | S                     | 273         | 255   |                | 20-88     | 4                                         |                                          |
| Belgium                         | INTERSALT, Charleroi [1]                                                  | U                           | 1986                        | S                     | 82          | 75    |                | 20-59     | 2                                         |                                          |
| Belgium                         | INTERSALT, Ghent [1]                                                      | U                           | 1986                        | S                     | 100         | 100   |                | 20-59     | 2                                         |                                          |
| Belgium                         | Zhang et al. [46]                                                         | B                           | 1997                        | N                     | 4,248       | 3,996 |                | 25-74     | 2                                         | 3                                        |
| Belgium                         | Vandevijvere et al. [47]                                                  | U                           | 2007                        | S                     | 60          | 54    |                | 25-65     | 4                                         |                                          |
| Belgium                         | Vandevijvere et al. [47]                                                  | U                           | 2009                        | S                     | 66          | 69    |                | 25-65     | 4                                         |                                          |
| Denmark                         | INTERSALT, Glostrup [1]                                                   | U                           | 1986                        | S                     | 99          | 100   |                | 20-59     | 2                                         |                                          |
| Denmark                         | Dietary Habits of Denmark [48]                                            | D                           | 2001                        | N                     | 1,448       | 1,486 |                | 20-100    |                                           | 1                                        |
| Denmark                         | Andersen et al. [49]                                                      | U                           | 2006                        | S                     | 37          | 50    |                | 20-55     | 1                                         |                                          |
| Finland                         | Laatikainen et al. (2 of 11) [50]                                         | U                           | 1982                        | S                     | 247         | 237   |                | 25-64     | 3                                         |                                          |
| Finland                         | Laatikainen et al. (6 of 11) [50]                                         | U                           | 1982                        | S                     | 213         | 215   |                | 25-64     | 3                                         |                                          |
| Finland                         | Laatikainen et al. (8 of 11) [50]                                         | U                           | 1982                        | S                     | 232         | 238   |                | 25-64     | 3                                         |                                          |
| Finland                         | INTERSALT, Turku [1]                                                      | U                           | 1986                        | S                     | 100         | 100   |                | 20-59     | 2                                         |                                          |
| Finland                         | Laatikainen et al. (3 of 11) [50]                                         | U                           | 1987                        | S                     | 199         | 210   |                | 25-64     | 3                                         |                                          |
| Finland                         | Laatikainen et al. (7 of 11) [50]                                         | U                           | 1987                        | S                     | 180         | 220   |                | 25-64     | 3                                         |                                          |
| Finland                         | Laatikainen et al. (9 of 11) [50]                                         | U                           | 1987                        | S                     | 150         | 192   |                | 25-64     | 3                                         |                                          |
| Finland                         | FINDIET 1992 [51]                                                         | D                           | 1992                        | N                     | 870         | 991   |                | 25-64     |                                           | 1                                        |
| Finland                         | Laatikainen et al. (11 of 11) [50]                                        | U                           | 2002                        | S                     | 127         | 156   |                | 25-64     | 2                                         |                                          |
| Finland                         | Laatikainen et al. (4 of 11) [50]                                         | U                           | 2002                        | S                     | 168         | 174   |                | 25-64     | 2                                         |                                          |
| Finland                         | Reinivuo et al. [52]                                                      | D                           | 2002                        | S                     | 168         | 174   |                | 25-64     |                                           | 1                                        |

| Country (with included surveys) | Survey name or report authors (CM, corresponding members – see main text)           | Metrics (Urine, Diet, Both) | Mid-year of data collection | National, Subnational | Sample size |       |                | Age range | Urine method (where applic.) <sub>1</sub> | Diet method (where applic.) <sub>2</sub> |
|---------------------------------|-------------------------------------------------------------------------------------|-----------------------------|-----------------------------|-----------------------|-------------|-------|----------------|-----------|-------------------------------------------|------------------------------------------|
|                                 |                                                                                     |                             |                             |                       | M           | F     | T <sup>3</sup> |           |                                           |                                          |
| Finland                         | Reinivuo et al. [52]                                                                | D                           | 2002                        | S                     | 128         | 156   |                | 25-64     |                                           | 1                                        |
| Finland                         | Reinivuo et al. [52]                                                                | D                           | 2002                        | S                     | 127         | 156   |                | 25-64     |                                           | 1                                        |
| Finland                         | FINDIET 2007 [53]                                                                   | D                           | 2007                        | N                     | 959         | 1,080 |                | 25-74     |                                           | 1                                        |
| France                          | Meneton et al. (1 of 2) [54]                                                        | D                           | 1999                        | N                     | 672         | 802   |                | 20-92     |                                           | 1                                        |
| France                          | du Cailar et al. [55]                                                               | U                           | 2001                        | S                     |             |       | 855            | 20-70     | 4                                         |                                          |
| France                          | Etude nationale nutrition santé (ENNS); National Nutrition and Health survey [56]   | D                           | 2006                        | N                     | 975         | 1,701 |                | 20-74     |                                           | 1                                        |
| Germany                         | INTERSALT, Bernried [1]                                                             | U                           | 1986                        | S                     | 99          | 98    |                | 20-59     | 2                                         |                                          |
| Germany                         | INTERSALT, Cottbus [1]                                                              | U                           | 1986                        | S                     | 99          | 99    |                | 20-59     | 2                                         |                                          |
| Germany                         | INTERSALT, Heidelberg [1]                                                           | U                           | 1986                        | S                     | 97          | 99    |                | 20-59     | 2                                         |                                          |
| Germany                         | German Nutrition Survey 1998 [57]                                                   | D                           | 1998                        | N                     | 1,691       | 2,170 |                | 20-79     |                                           | 2                                        |
| Germany                         | Nationale Verzehrs Studie II, Ergebnisbericht, Teil 2 [58]                          | D                           | 2006                        | N                     | 6381        | 7578  |                | 20-80     |                                           | 1                                        |
| Iceland                         | INTERSALT, Reykjavik and district [1]                                               | U                           | 1986                        | S                     | 100         | 100   |                | 20-59     | 2                                         |                                          |
| Iceland                         | Dietary Survey of the Icelanders [59]                                               | D                           | 1990                        | N                     | 531         | 564   |                | 20-80     |                                           | 3                                        |
| Iceland                         | The Diet of Icelanders, Dietary Survey of The Icelandic Nutrition Council 2002 [60] | D                           | 2002                        | N                     | 517         | 601   |                | 20-80     |                                           | 3                                        |
| Iceland                         | Olafsdottir et al. [61]                                                             | B                           | 2003                        | S                     |             | 120   |                | 25-55     | 1                                         | 3                                        |
| Ireland                         | Flynn et al. [62]                                                                   | U                           | 1987                        | S                     | 46          | 48    |                | 20-60     | 4                                         |                                          |
| Israel                          | Mabat First Israeli National Health and Nutrition Survey [63]                       | D                           | 2000                        | N                     | 1,540       | 1,700 |                | 25-64     |                                           | 3                                        |
| Israel                          | Mabat National Health and Nutrition Survey of the Elderly ( Zahav) [64]             | D                           | 2005                        | N                     | 833         | 949   |                | 65-100    |                                           | 3                                        |
| Italy                           | INTERSALT, Bassiano [1]                                                             | U                           | 1986                        | S                     | 99          | 100   |                | 20-59     | 2                                         |                                          |
| Italy                           | INTERSALT, Gubbio [1]                                                               | U                           | 1986                        | S                     | 99          | 100   |                | 20-59     | 2                                         |                                          |
| Italy                           | INTERSALT, Mirano [1]                                                               | U                           | 1986                        | S                     | 100         | 100   |                | 20-59     | 2                                         |                                          |

| Country (with included surveys) | Survey name or report authors (CM, corresponding members – see main text)                                                                       | Metrics (Urine, Diet, Both) | Mid-year of data collection | National, Subnational | Sample size |       |                | Age range | Urine method (where applic.) <sub>1</sub> | Diet method (where applic.) <sub>2</sub> |
|---------------------------------|-------------------------------------------------------------------------------------------------------------------------------------------------|-----------------------------|-----------------------------|-----------------------|-------------|-------|----------------|-----------|-------------------------------------------|------------------------------------------|
|                                 |                                                                                                                                                 |                             |                             |                       | M           | F     | T <sup>3</sup> |           |                                           |                                          |
| Italy                           | INTERSALT, Naples [1]                                                                                                                           | U                           | 1986                        | S                     | 100         | 100   |                | 20-59     | 2                                         |                                          |
| Italy                           | Pavan et al. ( 1 of 4) [65]                                                                                                                     | D                           | 1994                        | S                     |             |       | 370            | 22-89     |                                           | 2                                        |
| Italy                           | INN-CA 1994-96 [66]                                                                                                                             | D                           | 1995                        | N                     | 701         | 888   |                | 20-100    |                                           | 1                                        |
| Italy                           | Venezia et al. [67]                                                                                                                             | U                           | 2003                        | S                     | 940         |       |                | 25-75     | 4                                         |                                          |
| Malta                           | INTERSALT, Dingli village [1]                                                                                                                   | U                           | 1986                        | S                     | 100         | 100   |                | 20-59     | 2                                         |                                          |
| Netherlands                     | INTERSALT, Zutphen [1]                                                                                                                          | U                           | 1986                        | S                     | 100         | 99    |                | 20-59     | 2                                         |                                          |
| Netherlands                     | Ocke et al. (CM)                                                                                                                                | U                           | 2006                        | S                     | 120         | 171   |                | 20-74     | 4                                         |                                          |
| Portugal                        | INTERSALT, Cartaxo Village [1]                                                                                                                  | U                           | 1986                        | S                     | 99          | 99    |                | 20-59     | 2                                         |                                          |
| Portugal                        | Polonia et al. [68]                                                                                                                             | U                           | 2000                        | S                     |             |       | 426            | 20-84     | 2                                         |                                          |
| Portugal                        | EPITeen Project [69]                                                                                                                            | D                           | 2003                        | N                     | 1,163       | 1,811 |                | 20-100    |                                           | 3                                        |
| Spain                           | INTERSALT, Manresa [1]                                                                                                                          | U                           | 1986                        | S                     | 100         | 100   |                | 20-59     | 2                                         |                                          |
| Spain                           | INTERSALT, Torrejon [1]                                                                                                                         | U                           | 1986                        | S                     | 100         | 100   |                | 20-59     | 2                                         |                                          |
| Spain                           | Schroder et al. [70]                                                                                                                            | D                           | 1995                        | S                     |             |       | 1,567          | 25-54     |                                           | 1                                        |
| Spain                           | The Catalan Nutrition Survey (ENCAT 2002-2003) and Serra Majem and Ribas, 2007 and Serra-Majem L et al., 2007 and Serra Majem et al., 2006 [71] | D                           | 2003                        | N                     | 869         | 1,054 |                | 20-100    |                                           | 1                                        |
| Spain                           | Ortega et al. [72]                                                                                                                              | U                           | 2009                        | N                     | 196         | 222   |                | 20-60     | 4                                         |                                          |
| Sweden                          | Dietary habits and nutrient intake in Sweden 1989 [73]                                                                                          | D                           | 1989                        | N                     | 743         | 770   |                | 20-74     |                                           | 3                                        |
| Sweden                          | Dietary habits and nutrient intake in Sweden 1997-98 [74]                                                                                       | D                           | 1997                        | N                     | 565         | 608   |                | 20-79     |                                           | 3                                        |
| Switzerland                     | Chappuis et al. [75]                                                                                                                            | U                           | 2010                        | N                     | 663         | 687   |                | 20-79     | 2                                         |                                          |
| United Kingdom                  | Bingham et al. [76]                                                                                                                             | U                           | 1985                        | S                     | 71          | 50    |                | 25-44     | 1                                         |                                          |
| United Kingdom                  | Dietary and Nutritional Survey of British Adults 1986 [77]                                                                                      | B                           | 1986                        | N                     | 1,597       | 1,620 |                | 20-64     | 1                                         | 3                                        |
| United Kingdom                  | INTERSALT, Belfast [1]                                                                                                                          | U                           | 1986                        | S                     | 99          | 100   |                | 20-59     | 2                                         |                                          |
| United Kingdom                  | INTERSALT, Birmingham [1]                                                                                                                       | U                           | 1986                        | S                     | 100         | 100   |                | 20-59     | 2                                         |                                          |

| Country (with included surveys) | Survey name or report authors (CM, corresponding members – see main text)                  | Metrics (Urine, Diet, Both) | Mid-year of data collection | National, Subnational | Sample size |       |                | Age range | Urine method (where applic.) <sub>1</sub> | Diet method (where applic.) <sub>2</sub> |
|---------------------------------|--------------------------------------------------------------------------------------------|-----------------------------|-----------------------------|-----------------------|-------------|-------|----------------|-----------|-------------------------------------------|------------------------------------------|
|                                 |                                                                                            |                             |                             |                       | M           | F     | T <sup>3</sup> |           |                                           |                                          |
| United Kingdom                  | INTERSALT, Bridgend, South-Wales [1]                                                       | U                           | 1986                        | S                     | 100         | 99    |                | 20-59     | 3                                         |                                          |
| United Kingdom                  | Fogarty et al. [78] (and CM)                                                               | U                           | 1991                        | S                     | 836         | 845   |                | 20-74     | 4                                         |                                          |
| United Kingdom                  | National Diet and Nutrition Survey: people aged 65 years and over [79]                     | D                           | 1994                        | N                     | 632         | 643   |                | 65-100    |                                           | 3                                        |
| United Kingdom                  | Khaw et al.(1 of 2) [80]                                                                   | D                           | 1995                        | S                     | 3,583       | 4,013 |                | 45-79     |                                           | 1                                        |
| United Kingdom                  | Khaw et al.(2 of 2) [80]                                                                   | U                           | 1995                        | S                     | 160         | 180   |                | 45-79     | 1                                         |                                          |
| United Kingdom                  | INTERMAP, West Bromwich [7]                                                                | B                           | 1997                        | S                     | 282         | 276   |                | 40-59     | 2                                         | 3                                        |
| United Kingdom                  | INTERMAP,Belfast [7]                                                                       | B                           | 1997                        | S                     | 250         | 194   |                | 40-59     | 2                                         | 3                                        |
| United Kingdom                  | National Diet and Nutrition Survey: adults aged 19-64 years 2000 [81]                      | B                           | 2000                        | N                     | 1,306       | 1,578 |                | 20-64     | 1                                         | 3                                        |
| United Kingdom                  | Low Income Diet and Health Survey, 2003-2005 [82]                                          | D                           | 2004                        | N                     | 1,021       | 1,910 |                | 20-100    |                                           | 1                                        |
| United Kingdom                  | National Centre for Social Research [83]                                                   | U                           | 2007                        | N                     | 181         | 248   |                | 25-64     | 1                                         |                                          |
| United Kingdom                  | National Centre for Social Research [84]                                                   | U                           | 2008                        | N                     | 341         | 439   |                | 20-64     | 1                                         |                                          |
| United Kingdom                  | Scottish centre for Social Research [85]                                                   | U                           | 2009                        | S                     | 324         | 232   |                | 20-64     | 1                                         |                                          |
| <b>Latin America, Central</b>   |                                                                                            |                             |                             |                       |             |       |                |           |                                           |                                          |
| Colombia                        | INTERSALT, Tuquerres [1]                                                                   | U                           | 1986                        | S                     | 96          | 95    |                | 20-59     | 2                                         |                                          |
| Guatemala                       | Melse-Boonstra et al. (4 of 4) [86]                                                        | U                           | 1996                        | S                     |             | 7     |                | 25-55     | 4                                         |                                          |
| Mexico                          | INTERSALT, Chihuahua [1]                                                                   | U                           | 1986                        | S                     | 91          | 81    |                | 20-59     | 2                                         |                                          |
| Mexico                          | National Health and Nutrition Survey 2006 ( Mexico) [87]                                   | D                           | 2005                        | N                     | 5,898       | 9,848 |                | 20-59     |                                           | 2                                        |
| <b>Latin America, Southern</b>  |                                                                                            |                             |                             |                       |             |       |                |           |                                           |                                          |
| Argentina                       | INTERSALT, Buenos Aires [1]                                                                | U                           | 1986                        | S                     | 100         | 100   |                | 20-59     | 2                                         |                                          |
| Argentina                       | Encuesta Nacional de Nutrición y Salud - National Nutrition and Health Survey (ENNyS) [88] | D                           | 2004                        | N                     |             | 4,429 |                | 20-49     |                                           | 3                                        |
| <b>Latin America,</b>           |                                                                                            |                             |                             |                       |             |       |                |           |                                           |                                          |



| Country (with included surveys)   | Survey name or report authors (CM, corresponding members – see main text) | Metrics (Urine, Diet, Both) | Mid-year of data collection | National, Subnational | Sample size |        |                | Age range | Urine method (where applic.) <sub>1</sub> | Diet method (where applic.) <sub>2</sub> |
|-----------------------------------|---------------------------------------------------------------------------|-----------------------------|-----------------------------|-----------------------|-------------|--------|----------------|-----------|-------------------------------------------|------------------------------------------|
|                                   |                                                                           |                             |                             |                       | M           | F      | T <sup>3</sup> |           |                                           |                                          |
| <b>Tropical</b>                   |                                                                           |                             |                             |                       |             |        |                |           |                                           |                                          |
| Brazil                            | Sarno et al. [89]                                                         | D                           | 2002                        | N                     |             |        | 48000          | 20-79     |                                           | 4                                        |
| Brazil                            | Household Health Survey (ISA-SP) [90]                                     | D                           | 2003                        | S                     | 724         | 806    | 1530           | 20-100    |                                           | 3                                        |
| <b>North Africa, Middle East</b>  |                                                                           |                             |                             |                       |             |        |                |           |                                           |                                          |
| Bahrain                           | National Nutrition Survey [91]                                            | D                           | 2000                        | N                     | 1,120       | 1,181  |                | 20-70     |                                           | 3                                        |
| Iran                              | Azizi et al. (1 of 2) [92]                                                | D                           | 1998                        | S                     |             |        | 340            | 20-79     |                                           | 2                                        |
| Iran                              | Azizi et al. (2 of 2) [92]                                                | D                           | 1998                        | S                     |             |        | 343            | 20-79     |                                           | 2                                        |
| Iran                              | Rahmani et al. [93]                                                       | D                           | 2000                        | S                     |             |        | 644            | 20-79     |                                           | 2                                        |
| Iran                              | Rafiei et al. [94]                                                        | U                           | 2001                        | S                     | 304         | 608    |                | 20-60     | 4                                         |                                          |
| Kuwait                            | National Nutrition Survey for the State of Kuwait [95]                    | D                           | 2008                        | N                     | 403         | 517    |                | 20-100    |                                           | 3                                        |
| Lebanon                           | National survey: Behavioral risk factor survey [96]                       | D                           | 2008                        | N                     | 1,207       | 1,385  |                | 20-100    |                                           | 2                                        |
| Turkey                            | Dietary intake of adult population living in Ankara [97]                  | D                           | 2005                        | S                     | 348         | 1,136  |                | 20-84     |                                           | 3                                        |
| Turkey                            | Erdem et al. [98]                                                         | U                           | 2007                        | N                     | 373         | 443    |                | 20-94     | 4                                         |                                          |
| <b>North America, High Income</b> |                                                                           |                             |                             |                       |             |        |                |           |                                           |                                          |
| Canada                            | INTERSALT, Labrador [1]                                                   | U                           | 1986                        | S                     | 78          | 83     |                | 20-59     | 2                                         |                                          |
| Canada                            | INTERSALT, St. Johns [1]                                                  | U                           | 1986                        | S                     | 100         | 100    |                | 20-59     | 2                                         |                                          |
| Canada                            | Canadian Community Health and Nutrition Survey [99]                       | D                           | 2004                        | N                     | 8,768       | 10,960 |                | 20-101    |                                           | 1                                        |
| Canada                            | Garriguet [100]                                                           | D                           | 2004                        | N                     | 2,724       | 2,724  |                | 20-79     |                                           | 3                                        |
| Canada                            | Shi et al. [101]                                                          | D                           | 2004                        | N                     | 3690        | 5177   |                | 30-79     |                                           | 3                                        |
| USA                               | Holbrook et al. [102]                                                     | B                           | 1981                        | S                     | 24          | 32     |                | 20-53     | 4                                         | 1                                        |
| USA                               | INTERSALT, Chicago [1]                                                    | U                           | 1986                        | S                     | 97          | 99     |                | 20-59     | 2                                         |                                          |
| USA                               | INTERSALT, Goodman, Blacks [1]                                            | U                           | 1986                        | S                     | 93          | 93     |                | 20-59     | 2                                         |                                          |

| Country (with included surveys) | Survey name or report authors (CM, corresponding members – see main text) | Metrics (Urine, Diet, Both) | Mid-year of data collection | National, Subnational | Sample size |       |                | Age range | Urine method (where applic.) <sub>1</sub> | Diet method (where applic.) <sub>2</sub> |
|---------------------------------|---------------------------------------------------------------------------|-----------------------------|-----------------------------|-----------------------|-------------|-------|----------------|-----------|-------------------------------------------|------------------------------------------|
|                                 |                                                                           |                             |                             |                       | M           | F     | T <sup>3</sup> |           |                                           |                                          |
| USA                             | INTERSALT, Goodman, Whites [1]                                            | U                           | 1986                        | S                     | 99          | 99    |                | 20-59     | 2                                         |                                          |
| USA                             | INTERSALT, Jackson, Blacks [1]                                            | U                           | 1986                        | S                     | 84          | 100   |                | 20-59     | 2                                         |                                          |
| USA                             | INTERSALT, Jackson, Whites [1]                                            | U                           | 1986                        | S                     | 100         | 99    |                | 20-59     | 2                                         |                                          |
| USA                             | INTERSALT, Molokai, Hawaii [1]                                            | U                           | 1986                        | S                     | 94          | 93    |                | 20-59     | 2                                         |                                          |
| USA                             | Cooper et al. [35]                                                        | U                           | 1992                        | S                     |             |       | 708            | 20-75     | 4                                         |                                          |
| USA                             | Espeland et al. [103]                                                     | B                           | 1993                        | S                     |             |       | 650            | 60-79     | 4                                         | 3                                        |
| USA                             | Taylor et al. (1 of 2) [104]                                              | U                           | 1996                        | S                     |             | 330   |                | 40-75     | 4                                         |                                          |
| USA                             | INTERMAP, Chicago [7]                                                     | B                           | 1997                        | S                     | 312         | 318   |                | 40-59     | 2                                         | 3                                        |
| USA                             | INTERMAP, City of Woodlawn, Baltimore, Maryland [7]                       | B                           | 1997                        | S                     | 292         | 268   |                | 40-59     | 2                                         | 3                                        |
| USA                             | INTERMAP, Corpus Christi, Hispanic [7]                                    | B                           | 1997                        | S                     | 270         | 280   |                | 40-59     | 2                                         | 3                                        |
| USA                             | INTERMAP, Corpus Christi, Non-Hispanic [7]                                | B                           | 1997                        | S                     | 272         | 272   |                | 40-59     | 2                                         | 3                                        |
| USA                             | INTERMAP, Honolulu [7]                                                    | B                           | 1997                        | S                     | 272         | 262   |                | 40-59     | 2                                         | 3                                        |
| USA                             | INTERMAP, Jackson [7]                                                     | B                           | 1997                        | S                     | 264         | 268   |                | 40-59     | 2                                         | 3                                        |
| USA                             | INTERMAP, Minneapolis [7]                                                 | B                           | 1997                        | S                     | 260         | 260   |                | 40-59     | 2                                         | 3                                        |
| USA                             | INTERMAP, Pittsburgh [7]                                                  | B                           | 1997                        | S                     | 264         | 256   |                | 40-59     | 2                                         | 3                                        |
| USA                             | NHANES 2003-2006 [105]                                                    | D                           | 2004                        | N                     | 9,118       | 9,912 |                | 20-85     |                                           | 1                                        |
| USA                             | Taylor et al. (2 of 2) [104]                                              | U                           | 2005                        | S                     |             | 146   |                | 40-75     | 4                                         |                                          |
| <b>Oceania</b>                  |                                                                           |                             |                             |                       |             |       |                |           |                                           |                                          |
| American Samoa                  | American Samoa 1990 24 hr recall diet estimates [106]                     | D                           | 1990                        | N                     | 235         | 268   |                | 25-54     |                                           | 3                                        |
| Niue                            | Taylor et al. [107]                                                       | U                           | 1980                        | N                     | 19          | 15    |                | 20-79     | 4                                         |                                          |
| Samoa                           | Western Samoa 1990 24 hr recall diet estimates [108]                      | D                           | 1991                        | N                     | 230         | 276   |                | 25-54     |                                           | 3                                        |
| <b>Sub-Saharan Africa, East</b> |                                                                           |                             |                             |                       |             |       |                |           |                                           |                                          |
| Kenya                           | INTERSALT, Rambuğu and Ndori villages [1]                                 | U                           | 1986                        | S                     | 90          | 86    |                | 20-59     | 2                                         |                                          |

| Country (with included surveys)     | Survey name or report authors (CM, corresponding members – see main text) | Metrics (Urine, Diet, Both) | Mid-year of data collection | National, Subnational | Sample size |     |                | Age range | Urine method (where applic.) <sub>1</sub> | Diet method (where applic.) <sub>2</sub> |
|-------------------------------------|---------------------------------------------------------------------------|-----------------------------|-----------------------------|-----------------------|-------------|-----|----------------|-----------|-------------------------------------------|------------------------------------------|
|                                     |                                                                           |                             |                             |                       | M           | F   | T <sup>3</sup> |           |                                           |                                          |
| Malawi                              | Simmons et al. (1 of 2) [109]                                             | U                           | 1983                        | S                     |             |     | 78             | 20-79     | 4                                         |                                          |
| Malawi                              | Simmons et al. (2 of 2) [109]                                             | U                           | 1983                        | S                     |             |     | 123            | 20-79     | 4                                         |                                          |
| Uganda                              | Pavan et al. (3 of 4) [65]                                                | D                           | 1994                        | S                     |             |     | 138            | 22-89     |                                           | 2                                        |
| United Republic of Tanzania         | Pavan et al. (2 of 4) [65]                                                | D                           | 1994                        | S                     |             |     | 232            | 22-85     |                                           |                                          |
| <b>Sub-Saharan Africa, Southern</b> |                                                                           |                             |                             |                       |             |     |                |           |                                           |                                          |
| South Africa                        | Barlow et al. (1 of 2) [110]                                              | U                           | 1982                        | S                     | 150         |     |                | 30-50     | 4                                         |                                          |
| South Africa                        | Barlow et al. (2 of 2) [110]                                              | U                           | 1982                        | S                     | 64          |     |                | 30-50     | 4                                         |                                          |
| South Africa                        | Food and nutrient availability in South African Households [111]          | D                           | 1995                        | N                     | 416         | 502 |                | 20-99     |                                           | 2                                        |
| South Africa                        | Charlton et al. (1 of 3) [112]                                            | B                           | 2002                        | S                     |             |     | 220            | 20-65     | 4                                         | 3                                        |
| South Africa                        | Charlton et al. (2 of 3) [112]                                            | B                           | 2002                        | S                     |             |     | 224            | 20-65     | 4                                         | 3                                        |
| South Africa                        | Charlton et al. (3 of 3) [112]                                            | B                           | 2002                        | S                     |             |     | 206            | 20-65     | 4                                         | 3                                        |
| South Africa                        | Maseko et al. [113]                                                       | U                           | 2003                        | S                     |             |     | 291            | 21-72     | 3                                         |                                          |
| Zimbabwe                            | INTERSALT, Harare [1]                                                     | U                           | 1986                        | S                     | 100         | 95  |                | 20-59     | 2                                         |                                          |
| <b>Sub-Saharan Africa, Western</b>  |                                                                           |                             |                             |                       |             |     |                |           |                                           |                                          |
| Benin                               | Melse-Boonstra et al. (2 of 4) [86]                                       | U                           | 1996                        | S                     |             | 13  |                | 22-55     | 4                                         |                                          |
| Cameroon                            | Cooper et al. [35]                                                        | U                           | 1992                        | S                     |             |     | 2828           | 25-74     | 4                                         |                                          |
| Cote d'Ivoire                       | Hess et al. (1 of 2) [114]                                                | U                           | 1997                        | S                     |             |     | 52             | 20-79     | 3                                         |                                          |
| Cote d'Ivoire                       | Hess et al. (2 of 2) [114]                                                | U                           | 1997                        | S                     |             |     | 51             | 20-79     | 3                                         |                                          |
| Ghana                               | Kerry et al. (1 of 2) [115]                                               | U                           | 2001                        | S                     |             |     | 481            | 40-75     | 2                                         |                                          |
| Ghana                               | Kerry et al. (2 of 2) [115]                                               | U                           | 2001                        | S                     |             |     | 532            | 40-75     | 2                                         |                                          |
| Nigeria                             | Cooper et al. [35]                                                        | U                           | 1992                        | S                     |             |     | 2509           | 45-94     | 3                                         |                                          |

---

<sup>1</sup> Quality control for urine collections:

1. PABA validation;
2. Exclusions based on observed/expected creatinine ratio or total urinary creatine (including Intersalt and InterMap);
3. Other strict urine collection protocols without use of PABA or creatinine;
4. Other collection protocol or not reported.

<sup>2</sup> Diet methods:

1. Multiple ( $\geq 2$ ) short-term (up to 1 week) diet recalls/ records (with or without) correction for within-person variation;
2. Food frequency questionnaires;
3. Single short-term diet records/ recalls;
4. Household availability/ budget survey.

<sup>3</sup> For surveys where sex-specific data was not available.

## References

1. The INTERSALT Co-operative Research Group (1989) Appendix tables. Centre-specific results by age and sex. *J Hum Hypertens* 3: 331-407.
2. Liu L, Mizushima S, Ikeda K, Hattori H, Miura A et al. (2000) Comparative studies of diet-related factors and blood pressure among Chinese and Japanese: results from the China-Japan Cooperative Research of the WHO-CARDIAC Study. *Cardiovascular Disease and Alimentary Comparison. Hypertension Research - Clinical & Experimental* 23: 413-420.
3. Kawamura M, Kimura Y, Takahashi K, Satoh N, Oku K et al. (1997) Relation of urinary sodium excretion to blood pressure, glucose metabolism, and lipid metabolism in residents of an area of Japan with high sodium intake. *Hypertension Research - Clinical & Experimental* 20: 287-293.
4. Matsumura, Yasuhiro. (CM) National Nutrition Survey, 1995.
5. Sasaki S, Ishihara J, Tsugane S (2003) Validity of a self-administered food frequency questionnaire in the 5-year follow-up survey of the JPHC Study Cohort I to assess sodium and potassium intake: comparison with dietary records and 24-hour urinary excretion level. *J Epidemiol* 13: S102-S105.
6. Inoue, Manami and Tsugane, Shoichiro. (CM) The Japan Public Health Center-based Prospective Study (JPHC Study) 1995-1998.
7. Stamler J, Elliott P, Chan Q (2003) INTERMAP appendix tables. *Journal of Human Hypertension* 17: 655-775.
8. Matsumura, Yasuhiro. (CM) National Nutrition Survey, 1998.

9. Kimira M, Kudo Y, Takachi R, Haba R, Watanabe S (2004) [Associations between dietary intake and urinary excretion of sodium, potassium, phosphorus, magnesium, and calcium]. *Nippon Eiseigaku Zasshi* 59: 23-30.
10. Inoue, Manami and Tsugane, Shoichiro. (CM) *The Japan Public Health Center-based Prospective Study (JPHC 5-year follow-up survey) 2000-2003.*
11. Kim, Cho il. (CM) *The 3rd Korea National Health and Nutrition Examination Survey.*
12. Yamada C, Oyunchimeg D, Erdenbat A, Enkhtuya P, Buttumur D et al. (2000) Estimation of salt intake and recommendation for iodine content in iodized salt in Mongolia. *Asia Pac J Public Health* 12: 27-31.
13. Zhao L, Stamler J, Yan LL, Zhou B, Wu Y et al. (2004) Blood pressure differences between northern and southern Chinese: role of dietary factors: the International Study on Macronutrients and Blood Pressure. *Hypertension* 43: 1332-1337.
14. Zhou BF, Yang J, Cao TX (1986) [Comparison of diets of 9 populations in China and their relation to blood pressure]. *Zhonghua Xin Xue Guan Bing Za Zhi* 14: 13-2.
15. Nan Y, Tian HG, Shao RC, Hu G, Dong QN et al. (1995) Assessment of sodium and potassium in processed foods in an urban area in China. *Eur J Clin Nutr* 49: 299-306.
16. Zhai FY, Yang XG (2006) *Report of National Nutrition and Health Survey of China Residents in 2002. Part 2: diet and nutrition intake (in Chinese).*
17. Pan, Wen Harn and Chang, Hsing Yi. (CM) *Nutrition and Health Survey in Taiwan.*
18. Ginnela, Brahmam and Nagalla, Balakrishna. (CM) *Diet & Nutrition Assessment Surveys Among Rural Communities in Select States of India, by National Nutrition Monitoring Bureau, 1996.*
19. Ginnela, Brahmam and Nagalla, Balakrishna. (CM) *Diet & Nutrition Assessment Surveys Among Rural Communities in Select States of India, by National Nutrition Monitoring Bureau, 2000.*

20. Radhika G, Sathya RM, Sudha V, Ganesan A, Mohan V (2007) Dietary salt intake and hypertension in an urban south Indian population-[CURES - 53]. *J Assoc Physicians India* 55: 405-411.
21. Ginnela, Brahmam and Nagalla, Balakrishna. (CM) *Diet & Nutrition Assessment Surveys Among Rural Communities in Select States of India*, by National Nutrition Monitoring Bureau, 2005.
22. Mustafa A, Muslimatun S, Untoro J, Lan MC, Kristianto Y (2006) Determination of discretionary salt intake in an iodine deficient area of East Java-Indonesia using three different methods. *Asia Pac J Clin Nutr* 15: 362-367.
23. Mirnalini K, Zalilah MS, Safiah MY, Tahir A, Siti Haslinda MD et al. (2008) Energy and Nutrient Intakes: Findings from the Malaysian Adult Nutrition Survey (MANS). *Mal J Nutr* 14: 1-24.
24. Piaseu, Noppawan. (CM) *Calcium Status, Factors Affecting Calcium and Bone Status in Healthy Thais Living in Bangkok*.
25. Kwanmaung, S. (2001) *Glomerular filtration rate, urine sodium and potassium excretions during the day and the night in young and elderly subjects (thesis) [dissertation]*. Bangkok: Faculty of Graduate Studies, Mahidol University, Thailand.
26. Beard TC, Eickhoff R, Mejglo ZA, Jones M, Bennett SA et al. (1992) Population-based survey of human sodium and potassium excretion. *Clin Exp Pharmacol Physiol* 19: 327-330.
27. Notowidjojo L, Truswell AS (1993) Urinary sodium and potassium in a sample of healthy adults in Sydney, Australia. *Asia Pacific Journal of Clinical Nutrition* 2: 25-33.
28. Beard TC, Woodward DR, Ball PJ, Hornsby H, von Witt RJ et al. (1997) The Hobart Salt Study 1995: few meet national sodium intake target. *Med J Aust* 166: 404-407.
29. Margerison C, Nowson C (2006) Dietary intake and 24-hour excretion of sodium and potassium. *Asia Pacific Journal of Clinical Nutrition* 15: S37.

30. Charlton K, Yeatman H, Houweling F, Guenon S (2010) Urinary sodium excretion, dietary sources of sodium intake and knowledge and practices around salt use in a group of healthy Australian women. *Aust N Z J Public Health* 34: 356-363. AZPH566 [pii];10.1111/j.1753-6405.2010.00566.x [doi].
31. Land, M. A., Webster, J., and Neal, B. (2011) Salt intake in New South Wales, Australia - results of a 24-hour urinary sodium excretion study in a representative adult population sample. Sydney: George Institute for Global Health.
32. Simpson FO, Paulin JM, Phelan EL, Thaler BI, Waal-Manning HJ et al. (1982) Further surveys in Milton, 1978 and 1981: blood pressure, height, weight and 24-hour excretion of sodium and potassium. *N Z Med J* 95: 873-876.
33. Thomson, C. D. and Colls, A. J. (1998) Twenty-four hour urinary sodium excretion in seven hundred residents of Otago and Waikato: a report prepared for the Ministry of Health. Wellington: Ministry of Health.
34. Templeton, Robert. (CM) 1997 National Nutrition Survey.
35. Cooper R, Rotimi C, Ataman S, McGee D, Osotimehin B et al. (1997) The prevalence of hypertension in seven populations of west African origin.[see comment]. *American Journal of Public Health* 87: 160-168.
36. Leske, M. C., Hennis, A., and Nemesure, B. (CM) Identifying new genetic and obesity-related factors contributing to prostate cancer risk in persons of African descent.
37. Simmons D (1983) Blood pressure, ethnic group, and salt intake in Belize. *J Epidemiol Community Health* 37: 38-42.
38. Jackson, Maria (2000) Social and dietary determinants of body mass index of adult Jamaicans.
39. Powles J, Sanz MA, Dokova K, Stoeva K, Duleva V et al. (2003) Sodium and potassium excretion in winter and summer in urban and rural Bulgarian populations heterogeneous for stroke risk [abstract]. *Gac Sanit* 17: 163.
40. Petrova, Stefka. (CM) National survey on nutrition and nutritional status of Bulgarian population.
41. Szponar, Lucjan and Oltarzewski, Maciej. (CM) National Food and Nutrition Institute.



42. Ribic CH, Zakotnik JM, Vertnik L, Vegnuti M, Cappuccio FP (2010) Salt intake of the Slovene population assessed by 24 h urinary sodium excretion. *Public Health Nutr* 1-7. S136898001000025X [pii];10.1017/S136898001000025X [doi].
43. Vaask, Sirje. (CM) Baltic Nutrition Survey, the Adults Nutrition Survey in Estonia.
44. Elmadfa, Ibrahim and Verena, Nowak. (CM) Austrian Study on Nutritional Status.
45. Staessen J, Bulpitt C, Fagard R, Joossens JV, Lijnen P et al. (1983) Four urinary cations and blood pressure. A population study in two Belgian towns. *American Journal of Epidemiology* 117: 676-687.
46. Zhang J, Temme EH, Sasaki S, Kesteloot H (2000) Under- and overreporting of energy intake using urinary cations as biomarkers: relation to body mass index. *Am J Epidemiol* 152: 453-462.
47. Vandevijvere S, De KW, Chapelle JP, Jeanne D, Mouillet G et al. (2010) Estimate of total salt intake in two regions of Belgium through analysis of sodium in 24-h urine samples. *Eur J Clin Nutr* 64: 1260-1265. ejcn2010148 [pii];10.1038/ejcn.2010.148 [doi].
48. Elmadfa, Ibrahim and Verena, Nowak. (CM) Dietary Habits of Denmark.
49. Andersen L, Rasmussen LB, Larsen EH, Jakobsen J (2009) Intake of household salt in a Danish population. *Eur J Clin Nutr* 63: 598-604.
50. Laatikainen T, Pietinen P, Valsta L, Sundvall J, Reinivuo H et al. (2006) Sodium in the Finnish diet: 20-year trends in urinary sodium excretion among the adult population. *European Journal of Clinical Nutrition* 60: 965-970.
51. Ovaskainen, Marja Leena and Tapanainen, Heli. (CM) FINDIET 1992.
52. Reinivuo H, Valsta LM, Laatikainen T, Tuomilehto J, Pietinen P (2006) Sodium in the Finnish diet: II trends in dietary sodium intake and comparison between intake and 24-h excretion of sodium. *Eur J Clin Nutr* 60: 1160-1167. 1602431 [pii];10.1038/sj.ejcn.1602431 [doi].
53. Ovaskainen, Marja Leena and Tapanainen, Heli. (CM) FINDIET 2007.

54. Meneton P, Lafay L, Tard A, Dufour A, Ireland J et al. (2009) Dietary sources and correlates of sodium and potassium intakes in the French general population. *Eur J Clin Nutr* 63: 1169-1175. [ejcn200957 \[pii\]](#);10.1038/ejcn.2009.57 [doi].
55. du CG, Mimran A, Fesler P, Ribstein J, Blacher J et al. (2004) Dietary sodium and pulse pressure in normotensive and essential hypertensive subjects. *Journal of Hypertension* 22: 697-703.
56. Castetbon, Katia. (CM) Etude nationale nutrition santé (ENNS).
57. Mensink, Gert. (CM) German Nutrition Survey 1998.
58. Elmadfa, Ibrahim and Verena, N. (CM) Nationale Verzehrsstudie II.
59. Steingrimsdottir, Laufey and Thorgeirsdóttir, Holmfridur. (CM) Icelandic National Nutrition Survey, 1990.
60. Steingrimsdottir, Laufey and Thorgeirsdóttir, Holmfridur. (CM) Icelandic National Nutrition Survey, 2002.
61. Olafsdottir AS, Thorsdottir I, Gunnarsdottir I, Thorgeirsdottir H, Steingrimsdottir L (2006) Comparison of women's diet assessed by FFQs and 24-hour recalls with and without underreporters: associations with biomarkers. *Ann Nutr Metab* 50: 450-460. [ANM2006050005450 \[pii\]](#);10.1159/000094781 [doi].
62. Flynn A, Shortt C, Morrissey PA (1990) Sodium and potassium intakes in Ireland. *Proc Nutr Soc* 49: 323-332. [S0029665190000386 \[pii\]](#).
63. Keinan-Boker, Lital. (CM) Mabat First Israeli National Health and Nutrition Survey, 1999-2001.
64. Keinan-Boker, Lital (2000) Mabat First Israeli National Health and Nutrition Survey, 2005-2006.
65. Pavan L, Casiglia E, Pauletto P, Batista SL, Ginocchio G et al. (1997) Blood pressure, serum cholesterol and nutritional state in Tanzania and in the Amazon: comparison with an Italian population. *Journal of Hypertension* 15: 1083-1090.
66. Turrini, Aida. (CM) INN-CA 1994-96.

67. Venezia A, Barba G, Russo O, Capasso C, De L, V et al. (2010) Dietary sodium intake in a sample of adult male population in southern Italy: results of the Olivetti Heart Study. *Eur J Clin Nutr* 64: 518-524. [ejcn201022 \[pii\];10.1038/ejcn.2010.22 \[doi\]](#).
68. Polonia J, Maldonado J, Ramos R, Bertoquini S, Duro M et al. (2006) Estimation of salt intake by urinary sodium excretion in a Portuguese adult population and its relationship to arterial stiffness. *Rev Port Cardiol* 25: 801-817.
69. Elmadfa, Ibrahim and Verena, Nowak. (CM) EPITeen Project.
70. Schroder H, Schmelz E, Marrugat J (2002) Relationship between diet and blood pressure in a representative Mediterranean population. *European Journal of Nutrition* 41: 161-167.
71. Elmadfa, Ibrahim and Verena, Nowak. (CM) The Catalan Nutrition Survey (ENCAT 2002-2003).
72. Ortega RM, Lopez-Sobaler AM, Ballesteros JM, Perez-Farinos N, Rodriguez-Rodriguez E et al. (2010) Estimation of salt intake by 24 h urinary sodium excretion in a representative sample of Spanish adults. *Br J Nutr* 105: 787-794. [S000711451000423X \[pii\];10.1017/S000711451000423X \[doi\]](#).
73. Becker, Wulf and Barbieri, Heléne. (CM) Dietary habits and nutrient intake in Sweden 1989 (Hulk).
74. Becker, Wulf and Barbieri, Heléne. (CM) Dietary habits and nutrient intake in Sweden 1997-98 (Riksmaten).
75. Chappuis, A., Bochud, M., Glatz, N., Vuistiner, P., Paccaud, F., and Burnier, M. (2011) Swiss survey on salt intake: main results. Lausanne: Service de Nephrologie et Institut Universitaire de Medecine Sociale et Preventive, Centre Hospitalier Universitaire Vaudois (CHUV).
76. Williams DR, Bingham SA (1986) Sodium and potassium intakes in a representative population sample: estimation from 24 h urine collections known to be complete in a Cambridgeshire village. *Br J Nutr* 55: 13-22. [S0007114586000065 \[pii\]](#).
77. Gregory, J., Foster, K., Tyler, H., and Wiseman, M. (1990) The dietary and nutritional survey of British adults. London: HMSO.

78. Fogarty AW, Lewis SA, McKeever TM, Britton JR (2009) 24-hour urinary sodium excretion in a population-based study of 2,633 individuals in Nottingham. *Am J Clin Nutr* 89: 1901-1904. [ajcn.2008.27006 \[pii\];10.3945/ajcn.2008.27006 \[doi\]](#).
79. Finch, S., Doyle, W., Lowe, C., Bates, C. J., , Prentice A., Smithers, G., and Clarke, P. C. (1998) National Diet and Nutrition Survey: people aged 65 years and over. Volume 1: Report of the diet and nutrition survey . London: The Stationery Office.
80. Khaw KT, Bingham S, Welch A, Luben R, O'Brien E et al. (2004) Blood pressure and urinary sodium in men and women: the Norfolk Cohort of the European Prospective Investigation into Cancer (EPIC-Norfolk).[see comment]. *American Journal of Clinical Nutrition* 80: 1397-1403.
81. Henderson, L., Irving, K., Gregory, J., Bates, C, Prentice, A., Perks, J., Swan, G., and Farron, M. (2003) The national diet and nutrition survey: adults aged 19 to 64 years, Volume 3: Vitamin and mineral intake and urinary analytes. London: TSO.
82. Nelson, M., Erens, B., Bates, B., Church, S., and Boshier, T. (2007) Low income diet and nutrition survey: Summary of key findings: A survey carried out on behalf of the Food Standards Agency. London: Food Standards Agency.
83. National Center for Social Research and UCL (2007) A survey of 24 hour and spot urinary sodium and potassium excretion in a representative sample of the Scottish population. London: National Center for Social Research. 30 p.
84. National Centre for Social Research, MRC Human Nutrition Research (2008) An assessment of dietary sodium levels among adults (aged 19-64) in the UK general population in 2008, based on analysis of dietary sodium in 24 hour urine samples.
85. Scottish Centre for Social Research (2011) A survey of 24 hour urinary sodium excretion in a representative sample of the Scottish population as a measure of salt intake. Edinburgh: Scottish Centre for Social Research.
86. Melse-Boonstra A, Rozendaal M, Rexwinkel H, Gerichhausen MJ, van den Briel T et al. (1998) Determination of discretionary salt intake in rural Guatemala and Benin to determine the iodine fortification of salt required to control iodine deficiency disorders: studies using lithium-labeled salt. *Am J Clin Nutr* 68: 636-641.
87. Sánchez-Romero, Luz Maria and Barquera, Simon. (CM) National Health and Nutrition Survey 2006.

88. Duran, Pablo. (CM) National Nutrition and Health Survey (ENNyS), 2004-2005.
89. Sarno F, Claro RM, Levy RB, Bandoni DH, Ferreira SR et al. (2009) [Estimated sodium intake by the Brazilian population, 2002-2003]. *Rev Saude Publica* 43: 219-225.
90. Fisberg, R. M. (CM) Household Health Survey (ISA-SP).
91. Musaiger, Abdulrahman. (CM) National Nutrition Survey.
92. Azizi F, Rahmani M, Allahverdian S, Hedayati M (2001) Effects of salted food consumption on urinary iodine and thyroid function tests in two provinces in the Islamic Republic of Iran. *East Mediterr Health J* 7: 115-120.
93. Rahmani M, Koohkan A, Allahverdian S, Hedayati M, Azizi F (2000) Comparison of dietary iodine intake and Urinary excretion in urban and rural Households of Ilam in 2000 (in Persian). *Iranian Journal of Endocrinology and Metabolism* 2.
94. Rafiei M, Boshtam M, Sarraf-Zadegan N, Seirafian S (2008) The relation between salt Intake and blood pressure among Iranians. *Kuwait Medical Journal* 40: 191-195.
95. Al-Hooti, Suad and Zaghoul, Sahar. (CM) National Nutrition Survey for the State of Kuwait.
96. Sibai, A. (CM) Non-communicable Diseases and Behavioral Risk Factor Survey (Lebanon).
97. Pekcan, Gulden. (CM) Dietary intake of adult population living in Ankara, 2005.
98. Erdem Y, Arici M, Altun B, Turgan C, Sindel S et al. (2010) The relationship between hypertension and salt intake in Turkish population: SALTURK study. *Blood Press* . 10.3109/08037051003802541 [doi].
99. Garriguet, Didier. (CM) Canadian Community Health Survey.
100. Garriguet D (2007) Sodium consumption at all ages. *Health Reports (Canada)* 18: 47-52.

101. Shi Y, de Groh M, Morrison H, Robinson C, Vardy L (2011) Dietary sodium intake among Canadian adults with and without hypertension. *Chronic Diseases in Canada* 31: 79-87.
102. Holbrook JT, Patterson KY, Bodner JE, Douglas LW, Veillon C et al. (1984) Sodium and potassium intake and balance in adults consuming self-selected diets. *American Journal of Clinical Nutrition* 40: 786-793.
103. Espeland MA, Kumanyika S, Wilson AC, Reboussin DM, Easter L et al. (2001) Statistical issues in analyzing 24-hour dietary recall and 24-hour urine collection data for sodium and potassium intakes. *American Journal of Epidemiology* 153: 996-1006.
104. Taylor EN, Curhan GC (2007) Differences in 24-hour urine composition between black and white women. *J Am Soc Nephrol* 18: 654-659. ASN.2006080854 [pii];10.1681/ASN.2006080854 [doi].
105. Center for Disease Control and Prevention (USA) (2010) NHANES 2003-2006.
106. McGarvey, Stephen and Ana, Baylin. (CM) American Samoa, 1990 (24 hr recall diet estimates).
107. Taylor R, Zimmet P, Levy S, Collins V (1985) Group comparisons of blood pressure and indices of obesity and salt intake in Pacific populations. *Med J Aust* 142: 499-501.
108. McGarvey, Stephen and Ana, Baylin. (CM) Western Samoa, 1990 (24 hr recall diet estimates).
109. Simmons D, Barbour G, Congleton J, Levy J, Meacher P et al. (1986) Blood pressure and salt intake in Malawi: an urban rural study. *J Epidemiol Community Health* 40: 188-192.
110. Barlow RJ, Connell MA, Milne FJ (1986) A study of 48-hour faecal and urinary electrolyte excretion in normotensive black and white South African males. *J Hypertens* 4: 197-200.
111. Bourne, Lesley. (CM) Food and nutrient availability in South African Households.
112. Charlton KE, Steyn K, Levitt NS, Zulu JV, Jonathan D et al. (2005) Diet and blood pressure in South Africa: Intake of foods containing sodium, potassium, calcium, and magnesium in three ethnic groups. *Nutrition* 21: 39-50.

113. Maseko MJ, Majane HO, Milne J, Norton GR, Woodiwiss AJ (2006) Salt intake in an urban, developing South African community. *Cardiovasc J S Afr* 17: 186-191.
114. Hess SY, Zimmermann MB, Staubli-Asobayire F, Tebi A, Hurrell RF (1999) An evaluation of salt intake and iodine nutrition in a rural and urban area of the Cote d'Ivoire. *Eur J Clin Nutr* 53: 680-686.
115. Kerry SM, Emmett L, Micah FB, Martin-Peprah R, Antwi S et al. (2005) Rural and semi-urban differences in salt intake, and its dietary sources, in Ashanti, West Africa. *Ethn Dis* 15: 33-39.
